# Supplementary material for: Chinese chive and Mongolian leek suppress heterocyclic amine formation and enhance nutritional profile of roasted cod
Source: Royal Society of Chemistry journal article supplement (doi:10.1039/d0ra05758d), 2020-01-01
Supplement: d0ra05758d1.pdf [file d0ra05758d1.pdf]

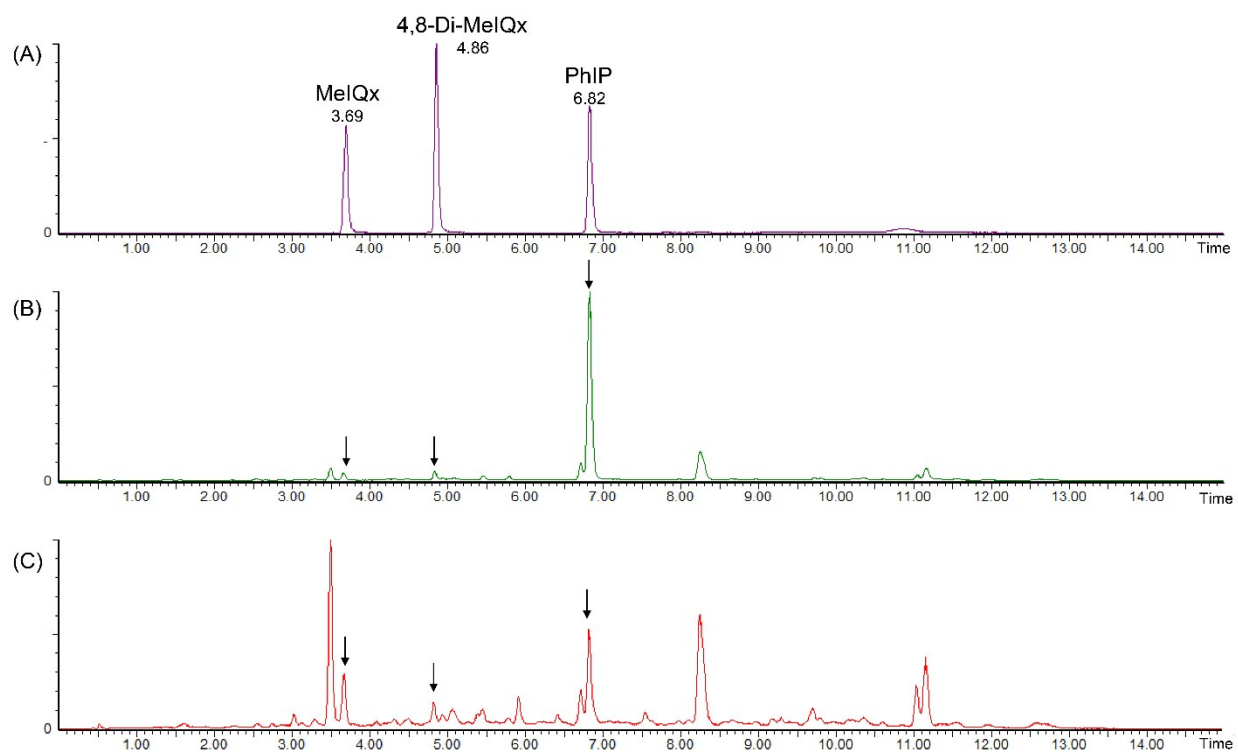

Suppl. Figure 1. LC-MS chromatograms of the heterocyclic amine (HA) standards (A), roasted cod patty without marination (control, B), and roasted cod patty pretreated with onion powders (C).
